# Supplementary material
Source: PubMed Central journal article supplement (PMC2562787)

Figure 11

|           |   |   |   |   |   |   |
|-----------|---|---|---|---|---|---|
| NADPH:    | - | + | - | + | - | + |
| GSH (mM): | 0 |   | 1 |   | 4 |   |

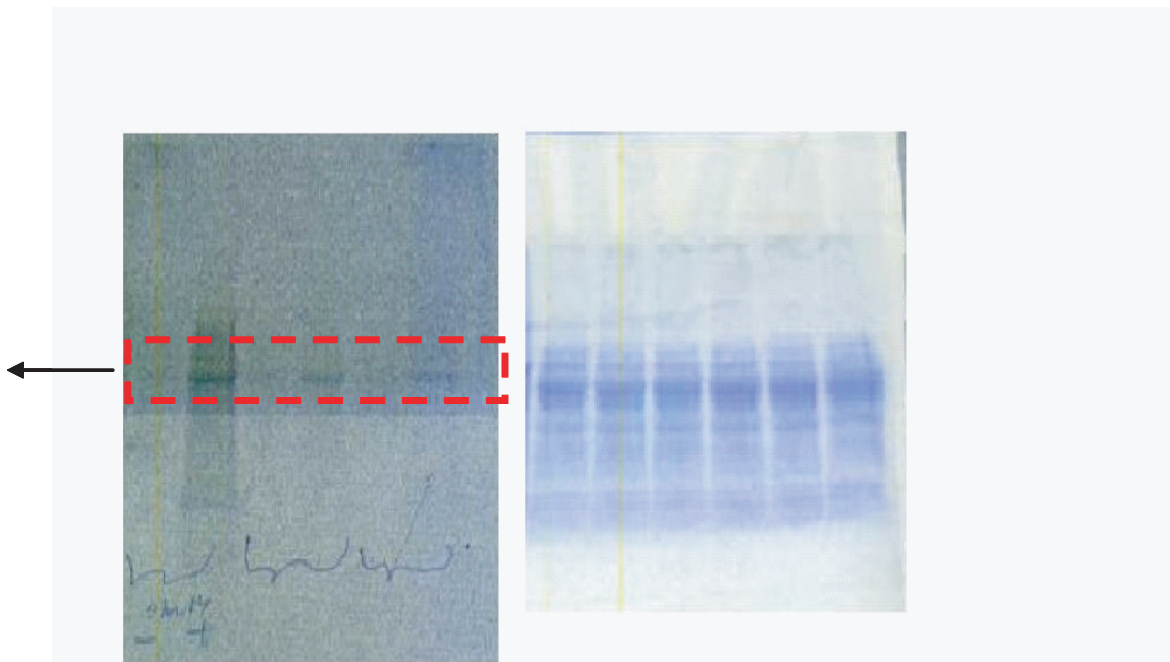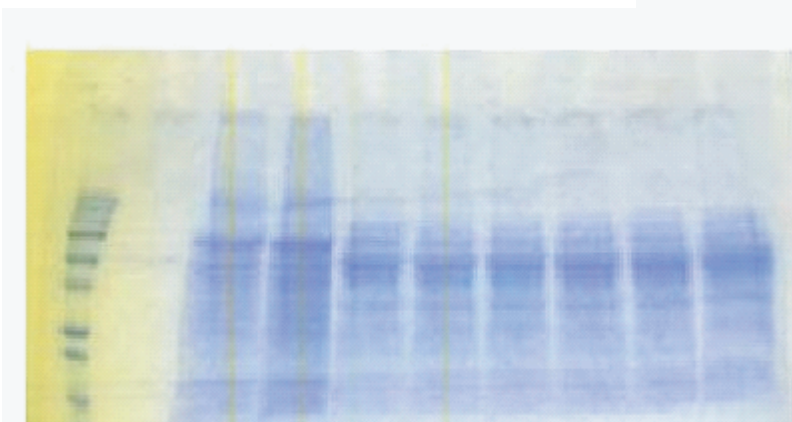

SDS-PAGE gel/dried

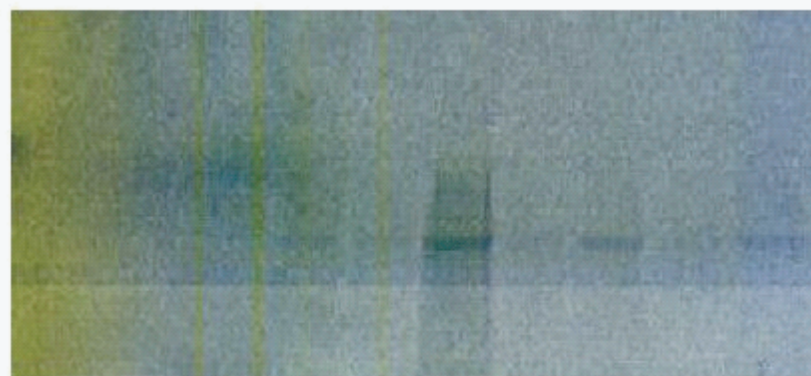

Corresponding PhosphorImager analyses (Full view)

Supplement: NIHMS49748-supplement-Supplement_Fig.pdf [file NIHMS49748-supplement-Supplement_Fig.pdf]
